# Supplementary material
Source: publisher site journal article supplement (https://www.dovepress.com/get_supplementary_file.php?f=448016.docx)
Supplement: Supplementary file 1 [file get_supplementary_file.php]

**Supplementary material**

Supplementary table 1. Round 1 analysis- differences in first-line corticosteroid choice according to seniority (specialist vs resident)

|  | | Specialist | | Resident | | P |
| --- | --- | --- | --- | --- | --- | --- |
|  | | n | % | n | % |  |
| Clobetasol propionate 0.05% soln. | never | 13 | 2.7% | 7 | 5.0% |  |
| sometimes | 335 | 70.8% | 83 | 59.7% |  |
| always | 125 | 26.4% | 49 | 35.3% |  |
| total | 473 | 100.0% | 139 | 100.0% | **0.037** |
| Clobetasol propionate 0.05% foam | never | 177 | 37.4% | 63 | 45.3% |  |
| sometimes | 275 | 58.1% | 75 | 54.0% |  |
| always | 21 | 4.4% | 1 | 0.7% |  |
| total | 473 | 100.0% | 139 | 100.0% | **0**.**046** |
| Clobetasol propionate 0.05% shampoo | never | 107 | 22.6% | 54 | 38.8% |  |
| sometimes | 333 | 70.4% | 70 | 50.4% |  |
| always | 33 | 7.0% | 15 | 10.8% |  |
| total | 473 | 100.0% | 139 | 100.0% | **< 0.001** |
| Betamethasone dipropionate 0.05% soln. | never | 80 | 16.9% | 37 | 26.6% |  |
| sometimes | 356 | 75.3% | 87 | 62.6% |  |
| always | 37 | 7.8% | 15 | 10.8% |  |
| total | 473 | 100.0% | 139 | 100.0% | **0.012** |
| Betamethasone dipropionate 0.1% lotion | never | 155 | 32.8% | 66 | 47.5% |  |
| sometimes | 302 | 63.8% | 71 | 51.1% |  |
| always | 16 | 3.4% | 2 | 1.4% |  |
| total | 473 | 100.0% | 139 | 100.0% | **0.005** |
| Halcinonide 0.1% soln. | never | 430 | 91.1% | 125 | 89.9% |  |
| sometimes | 38 | 8.1% | 14 | 10.1% |  |
| always | 4 | 0.8% | 0 | 0.0% |  |
| total | 472 | 100.0% | 139 | 100.0% | 0.425 |
| Mometasone furoate 0.1% lotion | never | 237 | 50.1% | 87 | 62.6% |  |
| sometimes | 224 | 47.4% | 50 | 36.0% |  |
| always | 12 | 2.5% | 2 | 1.4% |  |
| total | 473 | 100.0% | 139 | 100.0% | **0.033** |
| Mometasone furoate 0.1% soln. | never | 179 | 37.8% | 72 | 51.8% |  |
| sometimes | 277 | 58.6% | 61 | 43.9% |  |
| always | 17 | 3.6% | 6 | 4.3% |  |
| total | 473 | 100.0% | 139 | 100.0% | **0.009** |
| Fluocinolone acetonide 0.025% foam | never | 371 | 78.4% | 106 | 76.3% |  |
| sometimes | 99 | 20.9% | 33 | 23.7% |  |
| always | 3 | 0.6% | 0 | 0.0% |  |
| total | 473 | 100.0% | 139 | 100.0% | 0.512 |
| Fluocinolone acetonide 0.025% gel | never | 378 | 79.9% | 108 | 77.7% |  |
| sometimes | 89 | 18.8% | 30 | 21.6% |  |
| always | 6 | 1.3% | 1 | 0.7% |  |
| total | 473 | 100.0% | 139 | 100.0% | 0.68 |
| Desonide 0.05% lotion | never | 441 | 93.2% | 126 | 90.6% |  |
| sometimes | 29 | 6.1% | 13 | 9.4% |  |
| always | 3 | 0.6% | 0 | 0.0% |  |
| total | 473 | 100.0% | 139 | 100.0% | 0.275 |
| Hydrocortisone 1% lotion | never | 340 | 72.2% | 85 | 61.2% |  |
| sometimes | 128 | 27.2% | 52 | 37.4% |  |
| always | 3 | 0.6% | 2 | 1.4% |  |
| total | 471 | 100.0% | 139 | 100.0% | **0.038** |
| Prednicarbate 0.25% soln. | never | 250 | 52.9% | 96 | 69.1% |  |
| sometimes | 219 | 46.3% | 43 | 30.9% |  |
| always | 4 | 0.8% | 0 | 0.0% |  |
| total | 473 | 100.0% | 139 | 100.0% | **0.002** |
| Methylprednisolone 0.1% soln. | never | 162 | 34.3% | 70 | 50.4% |  |
| sometimes | 295 | 62.5% | 65 | 46.8% |  |
| always | 15 | 3.2% | 4 | 2.9% |  |
| total | 472 | 100.0% | 139 | 100.0% | **0.003** |
| Beclomethasone dipropionate 0.025% lotion | never | 291 | 61.5% | 92 | 66.2% |  |
| sometimes | 178 | 37.6% | 45 | 32.4% |  |
| always | 4 | 0.8% | 2 | 1.4% |  |
| total | 473 | 100.0% | 139 | 100.0% | 0.455 |
| Other | never | 429 | 91.5% | 132 | 95.0% |  |
| sometimes | 35 | 7.5% | 6 | 4.3% |  |
| always | 5 | 1.1% | 1 | 0.7% |  |
| total | 469 | 100.0% | 139 | 100.0% | 0.397 |

Soln.= solution, n= number, %= percentage.
